# Supplementary material for: Endothelial UCP2 Is a Mechanosensitive Suppressor of Atherosclerosis
Source: PubMed Central journal article supplement — Circ Res. 2022 Jul 28;131(5):424–41. doi: 10.1161/CIRCRESAHA.122.321187 (PMC9390236; doi:10.1161/circresaha.122.321187), 2022-07-28

Figure 1E:

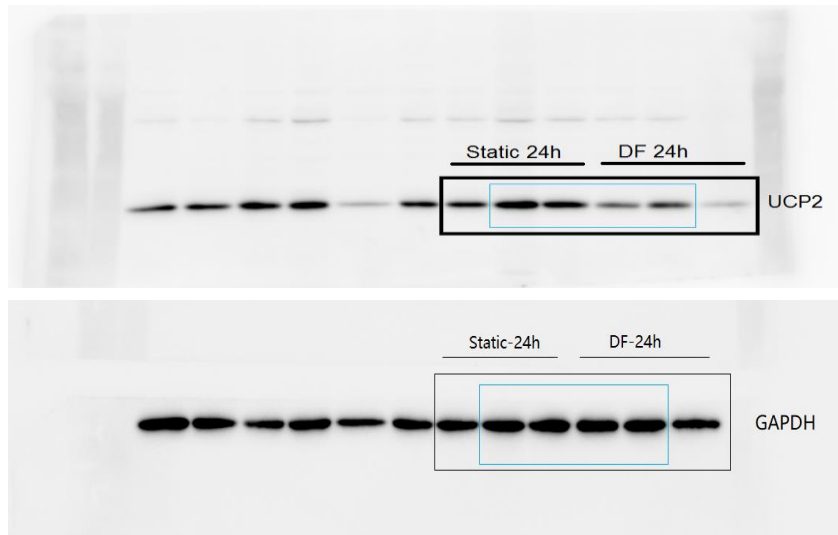

Figure 1F:

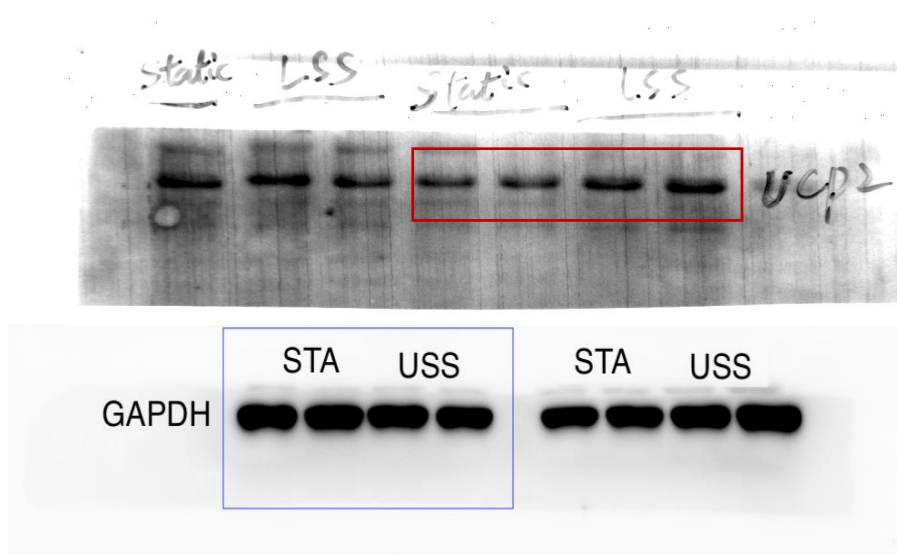

Figure 1H:

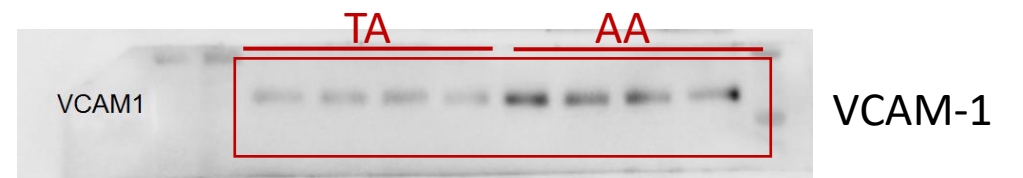

UCP2

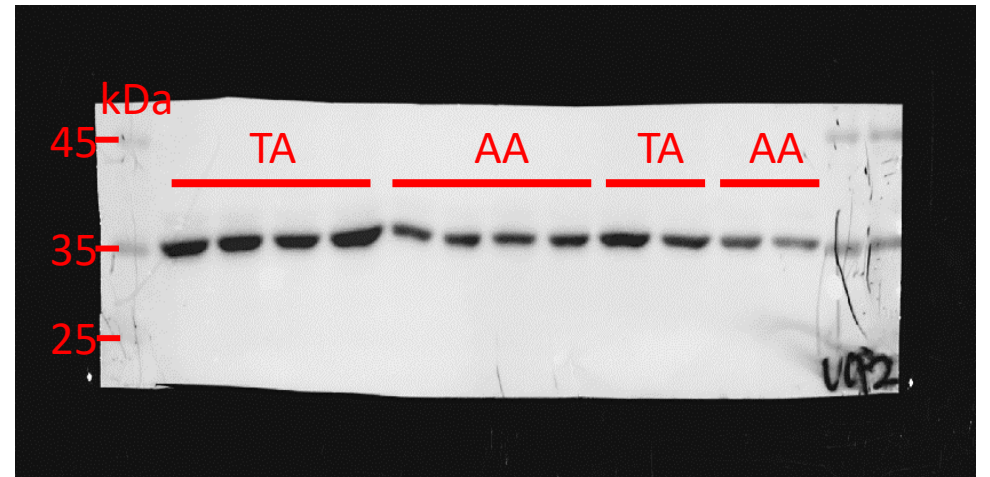

GAPDH

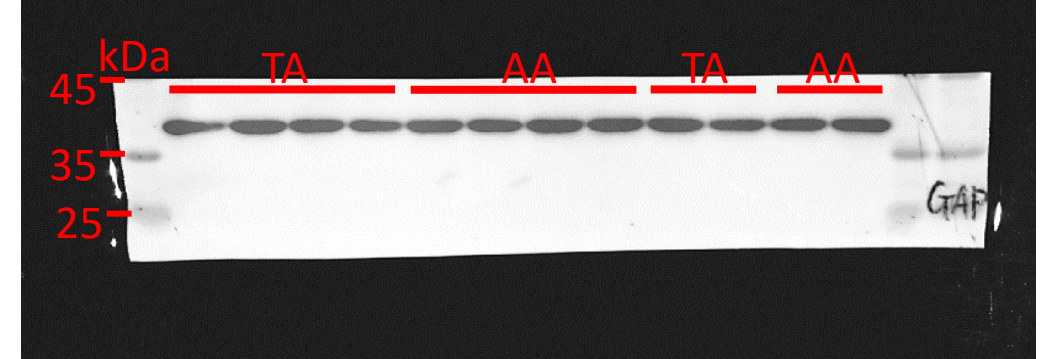

Figure 2C:

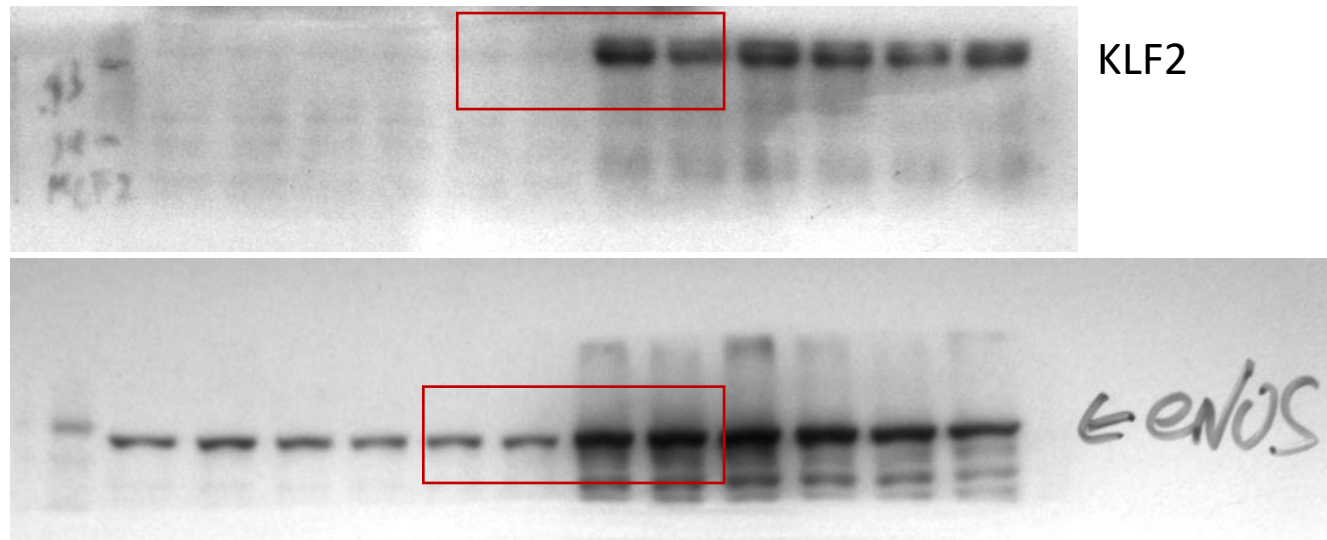

Figure 2F:

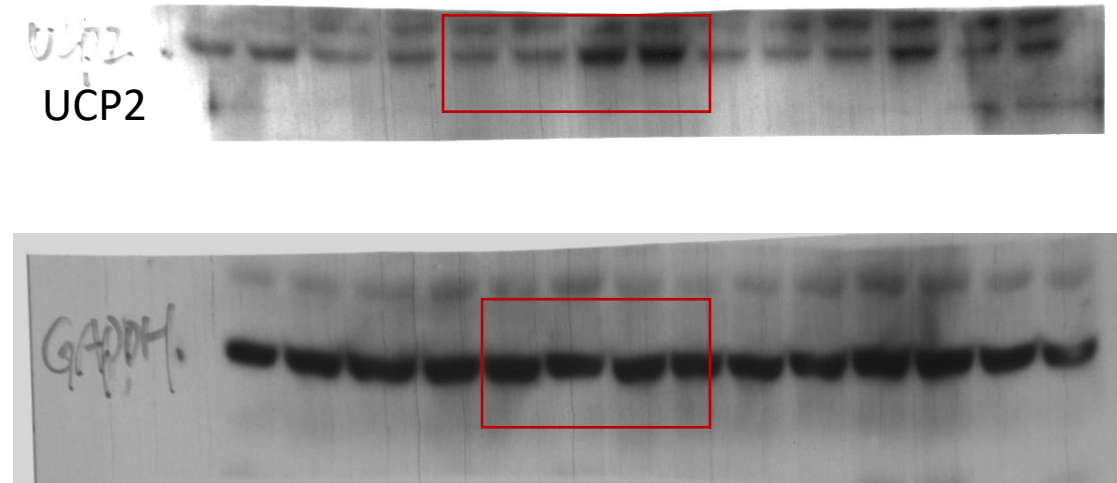

Figure 2H:

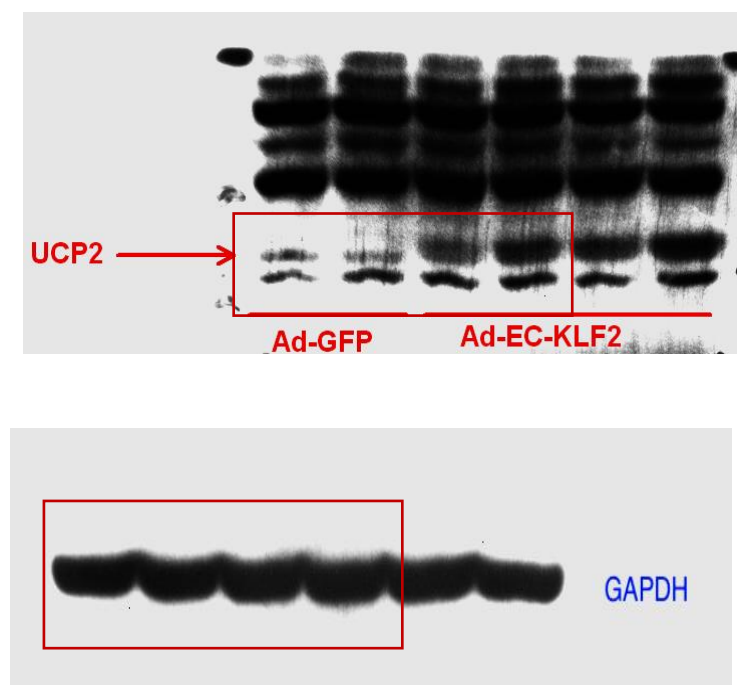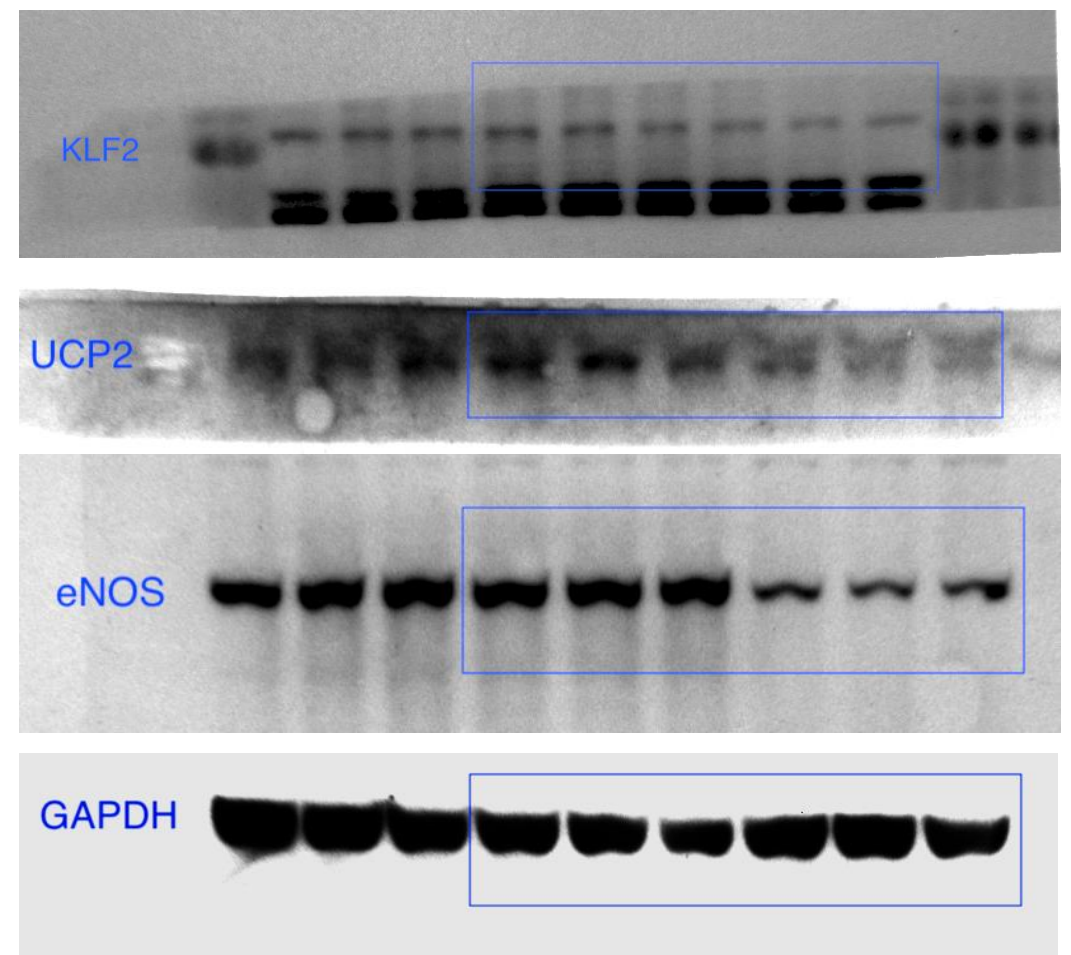



Figure 6F:

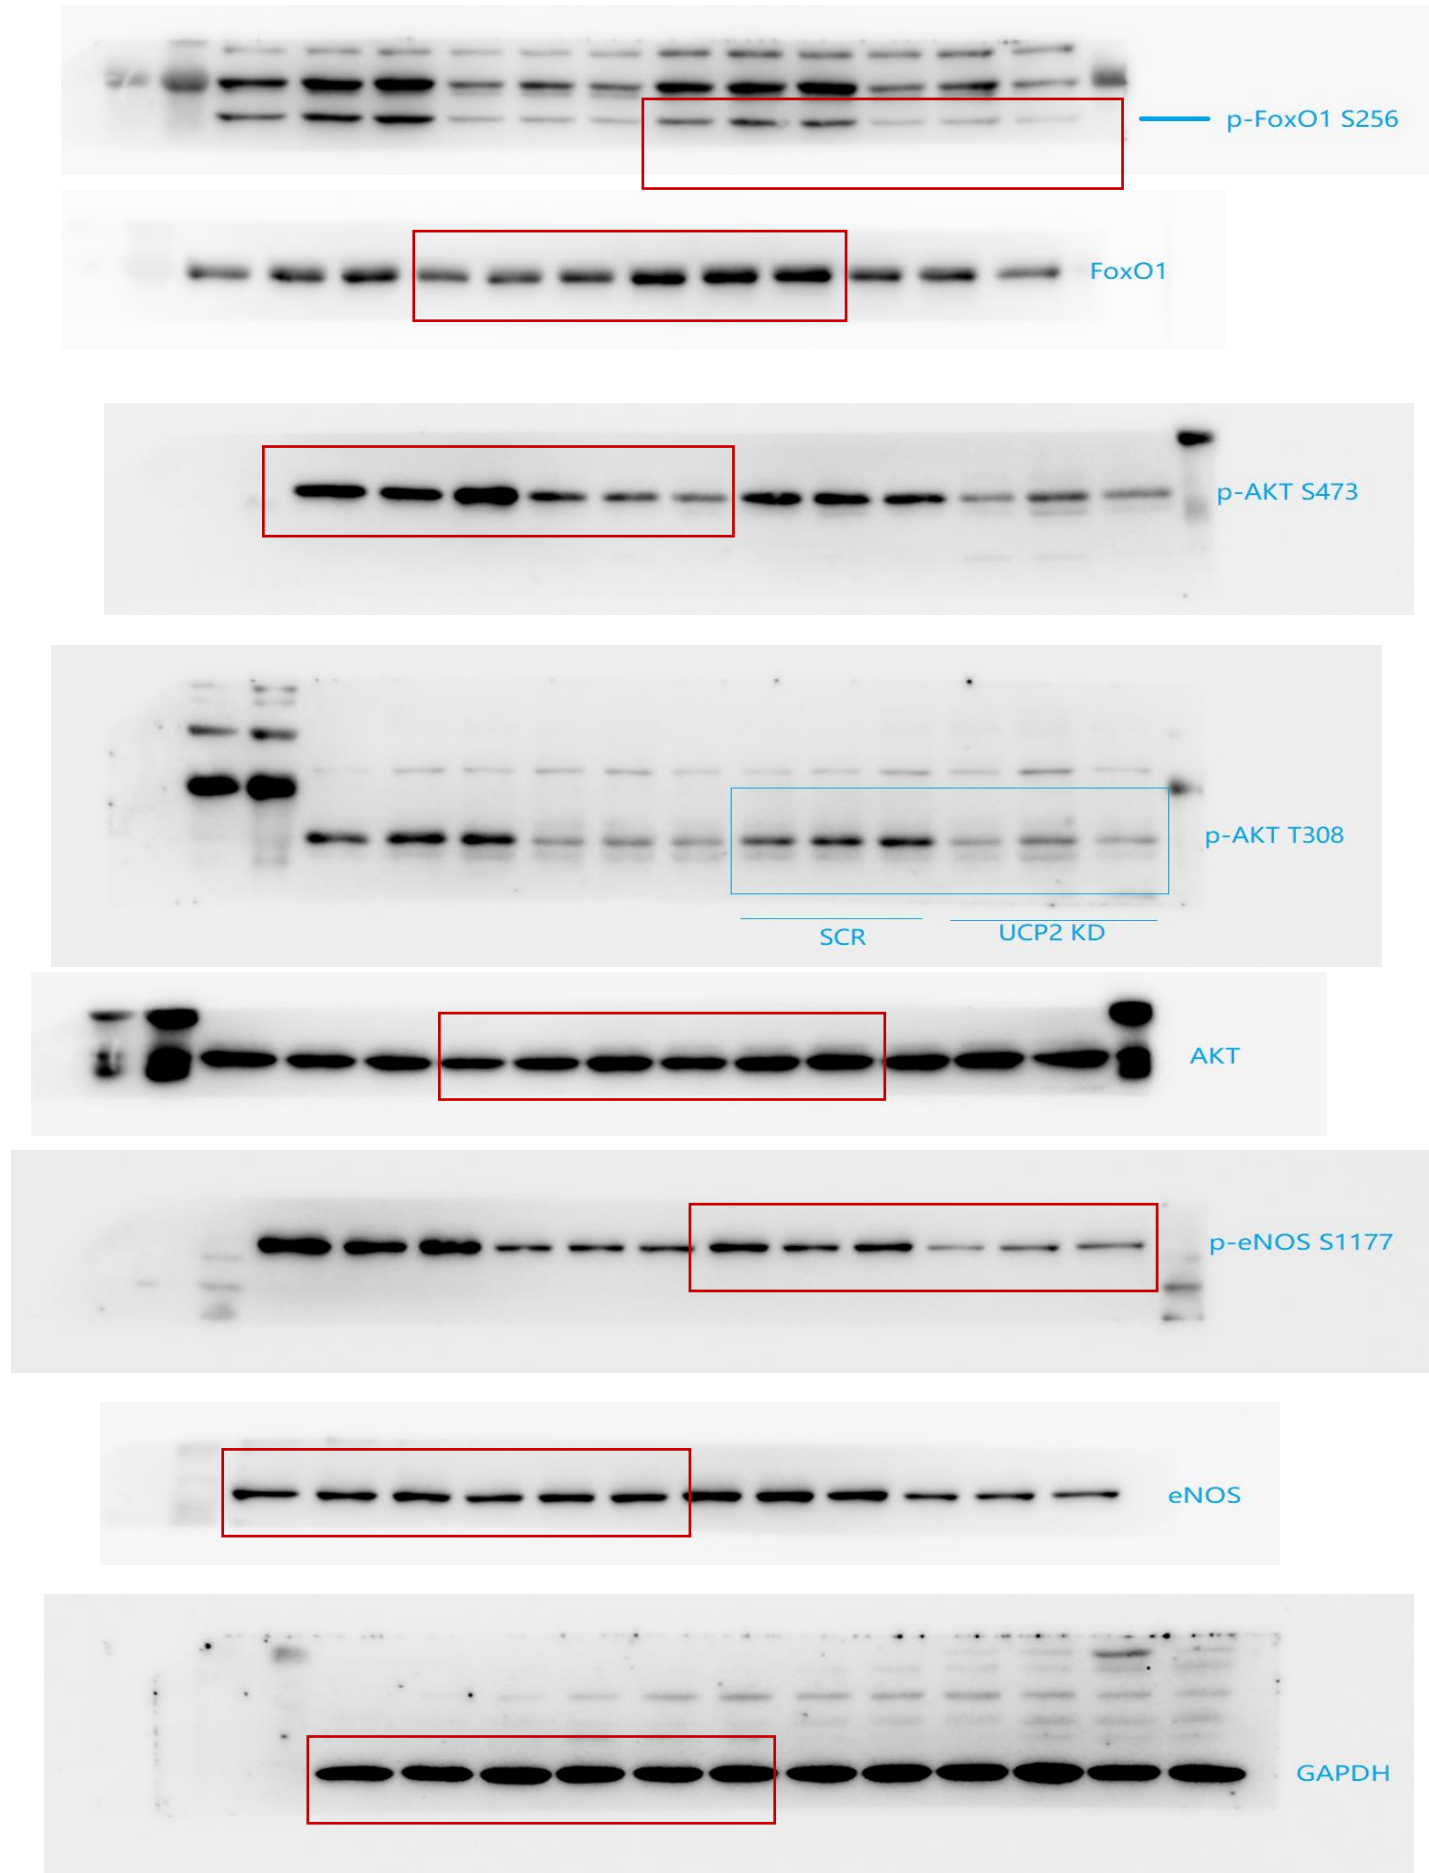

Figure 6H:

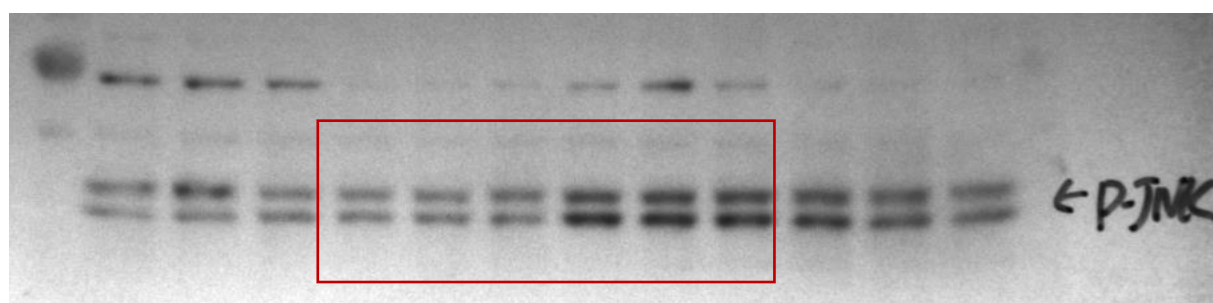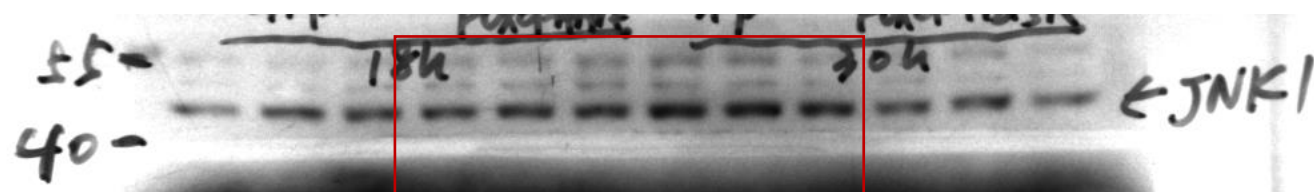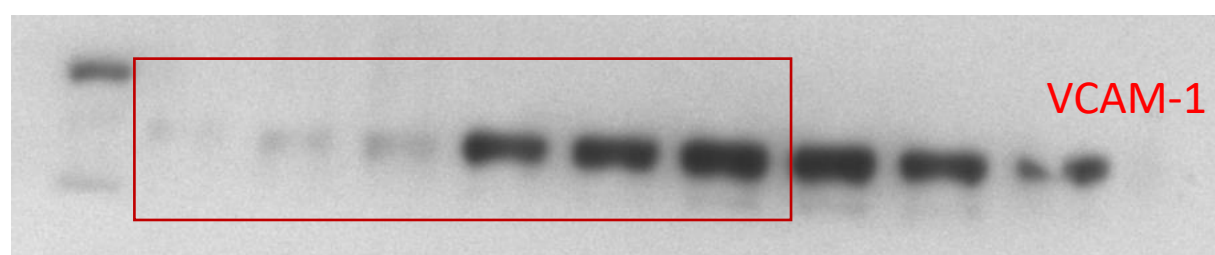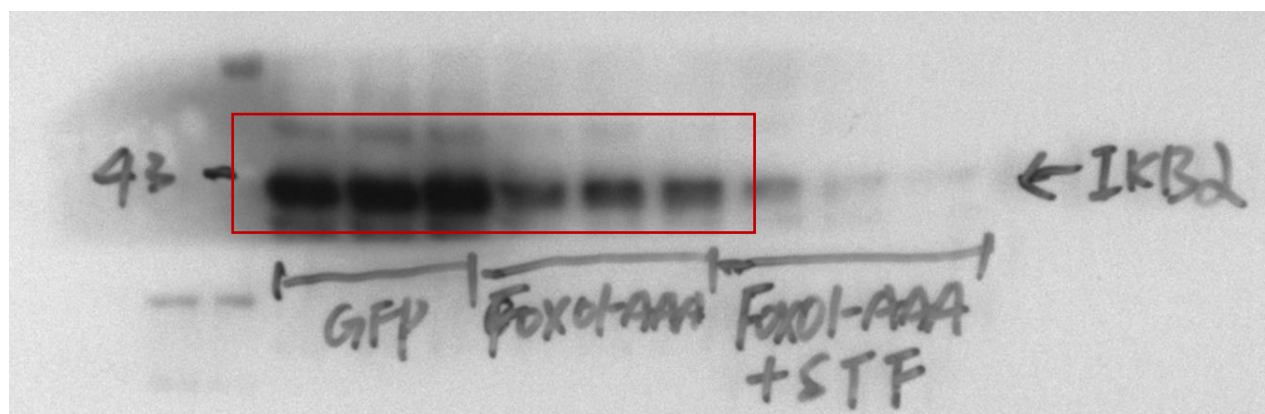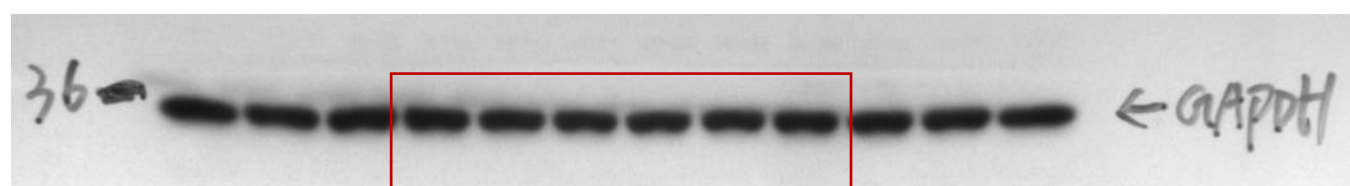

Figure 8A:

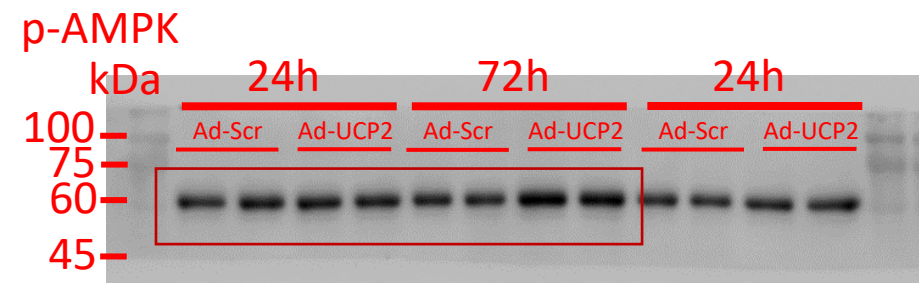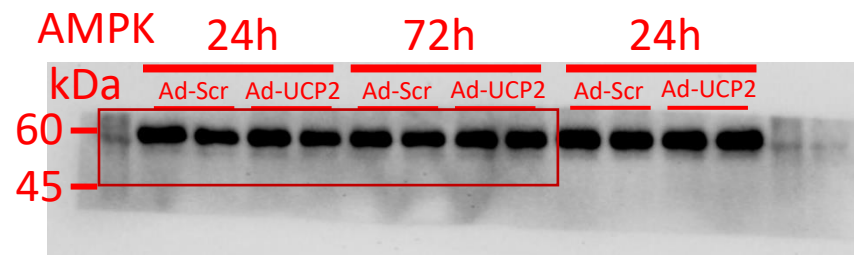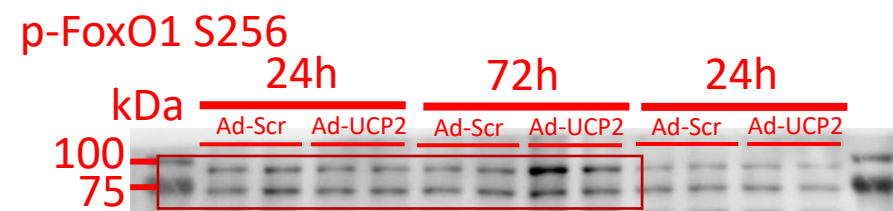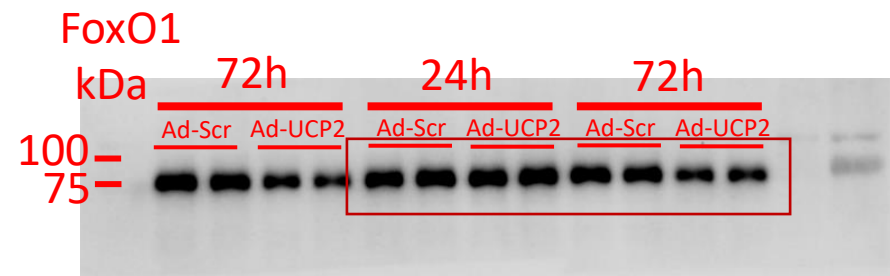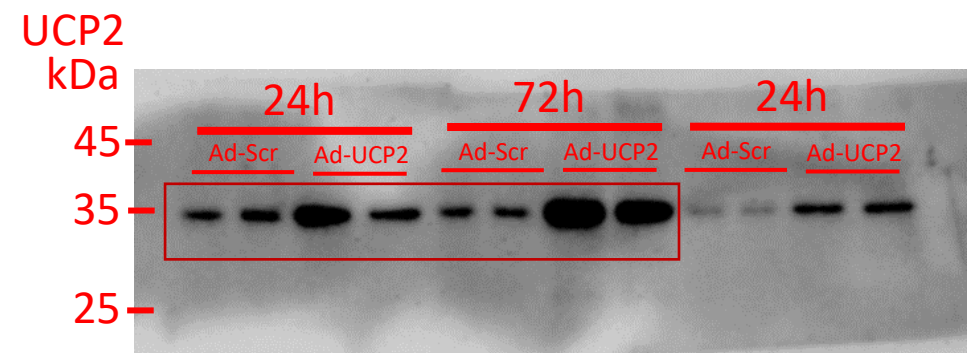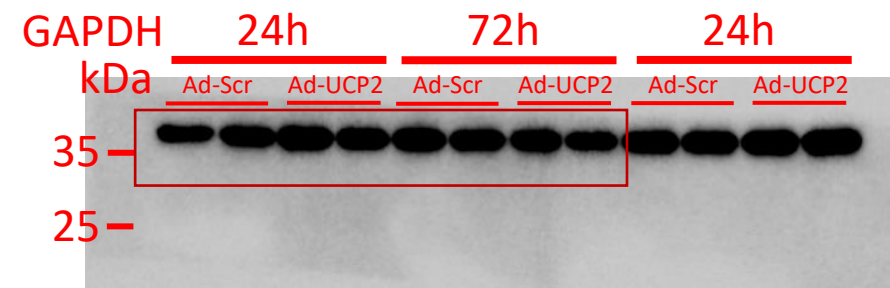

Figure 8B:

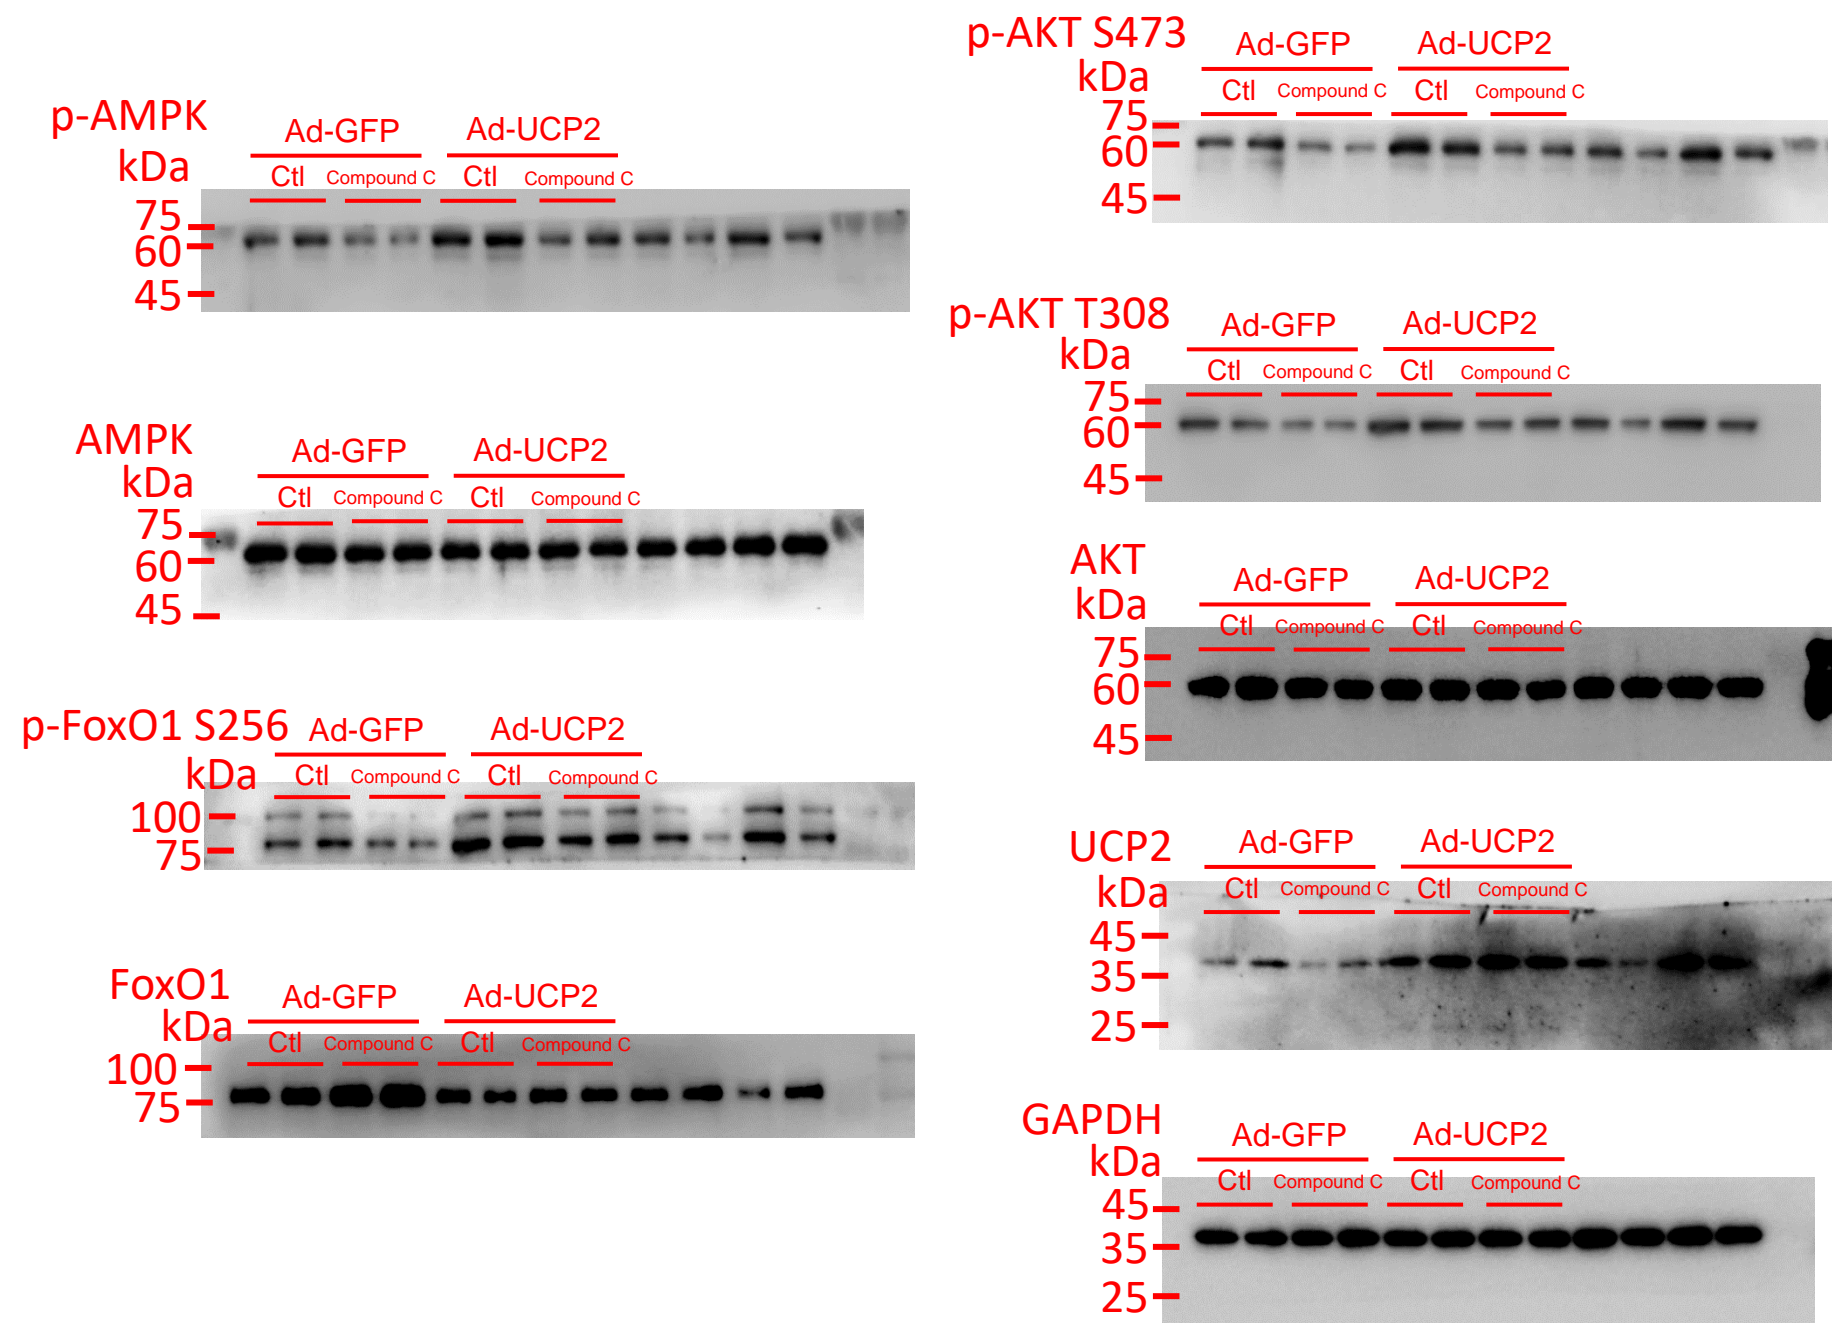

Figure 8D:

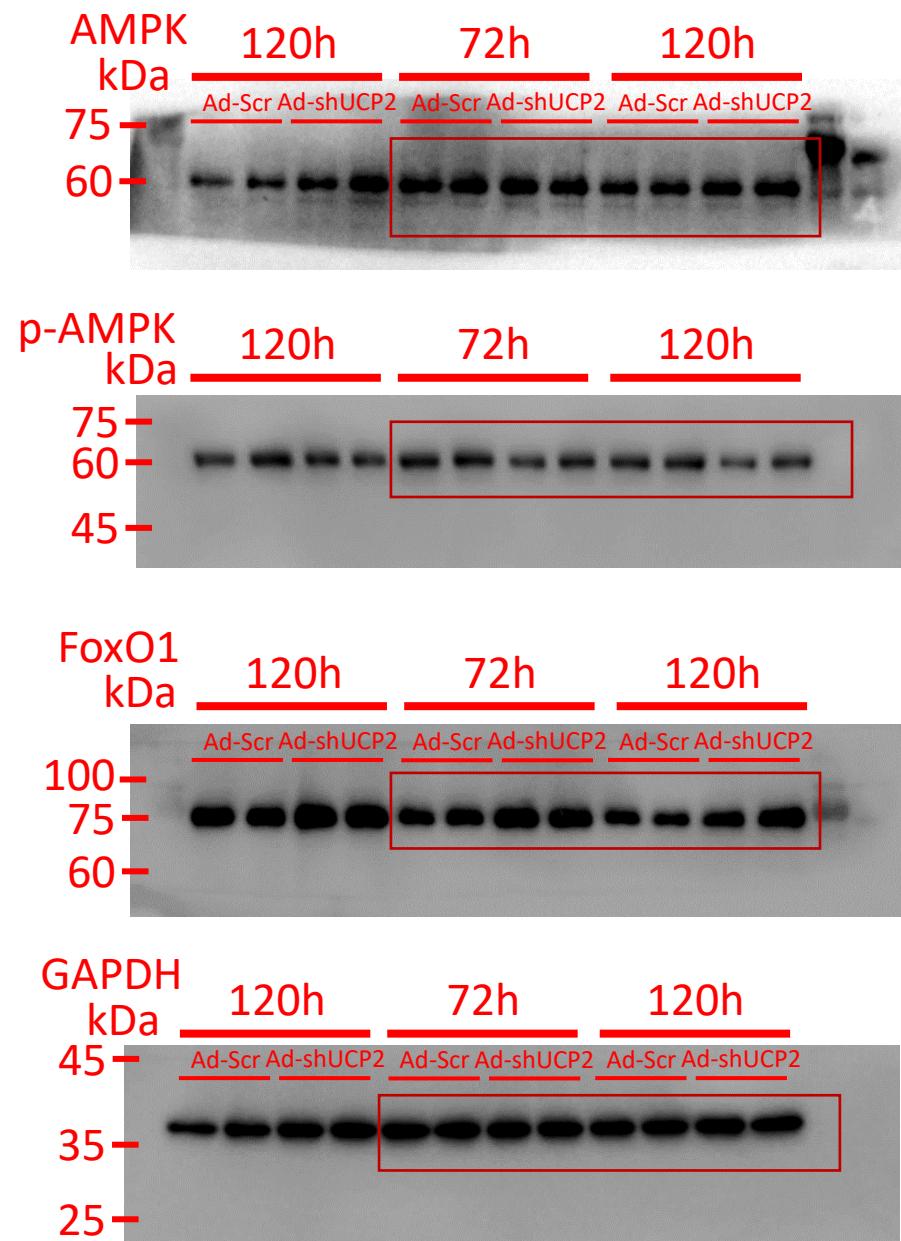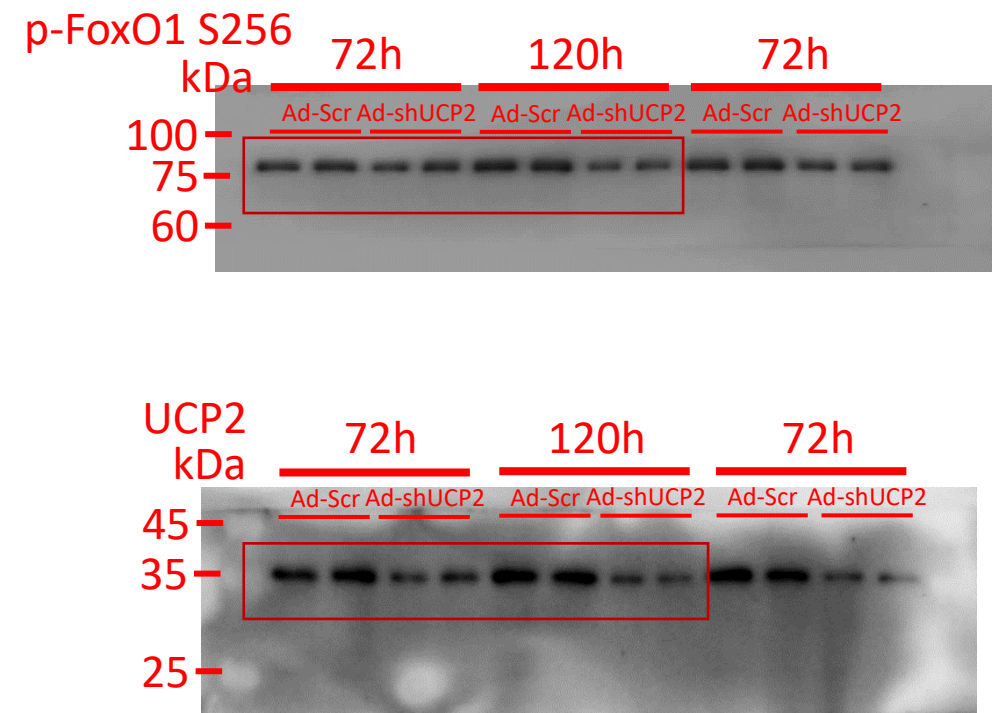



Figure 8E:

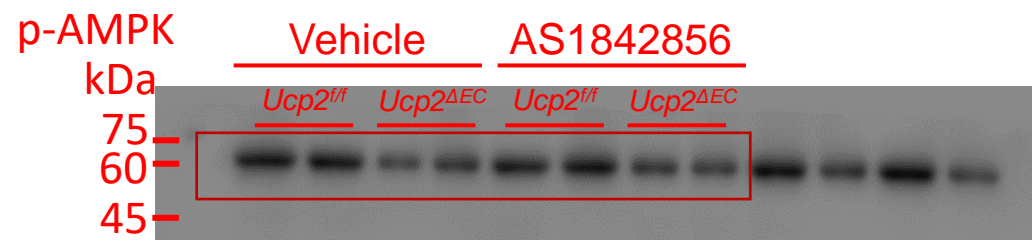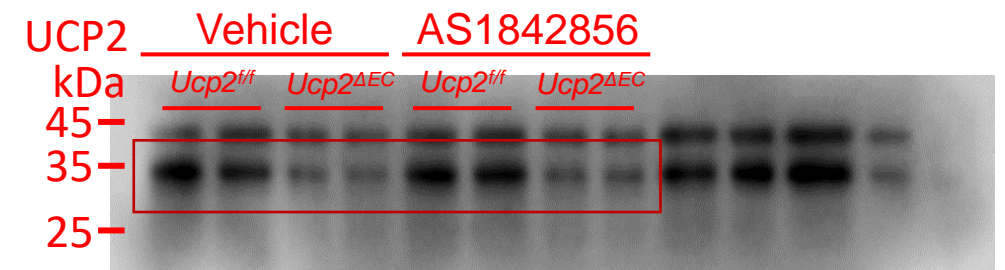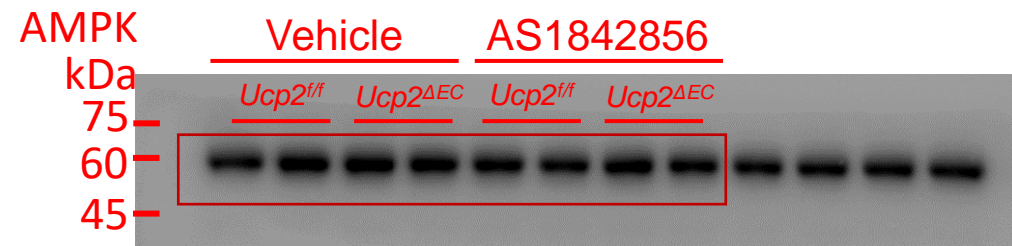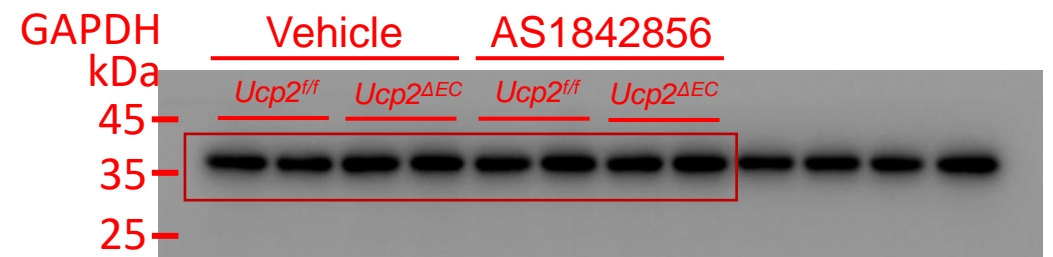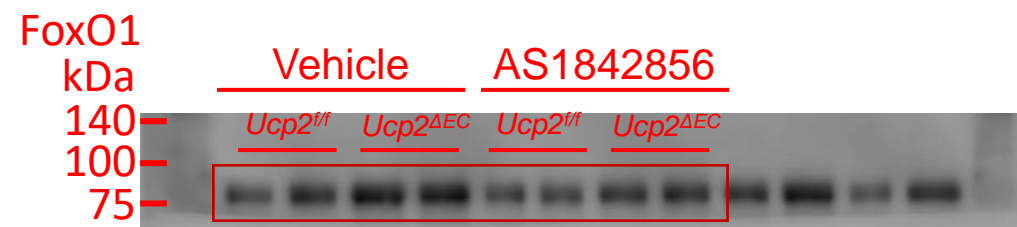

Online Supplemental  
Figure 2A/2C:

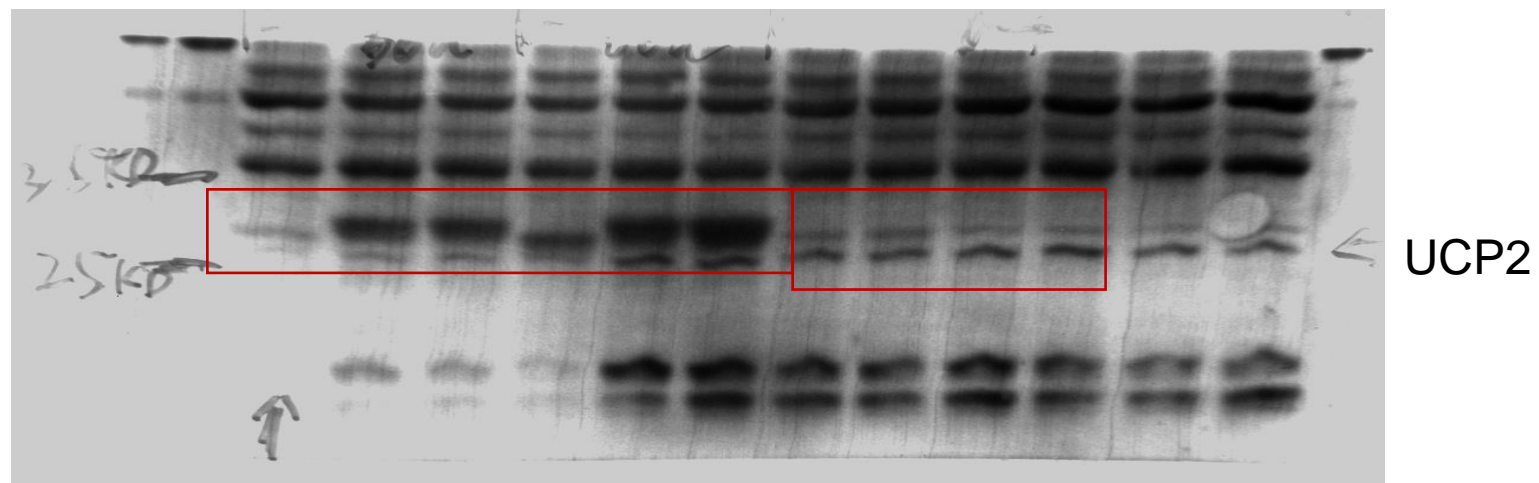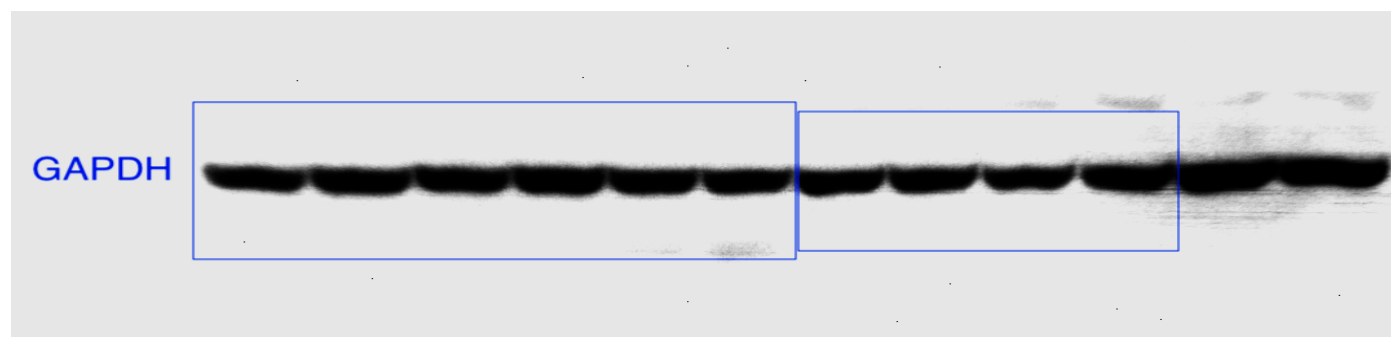

Online Supplemental  
Figure 3A:

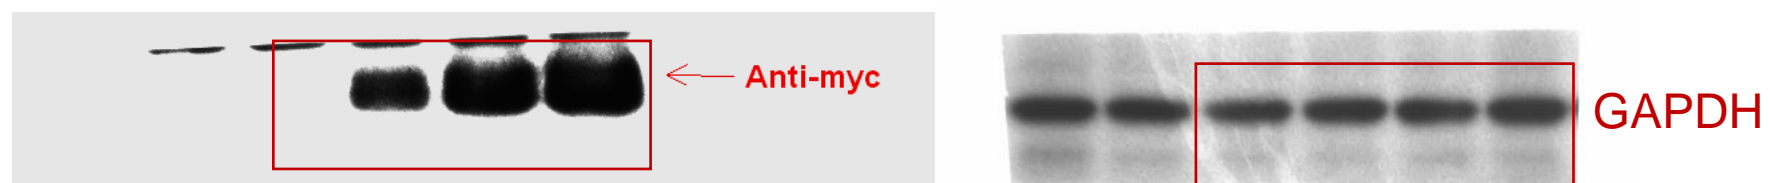

Online Supplemental  
Figure 4B:

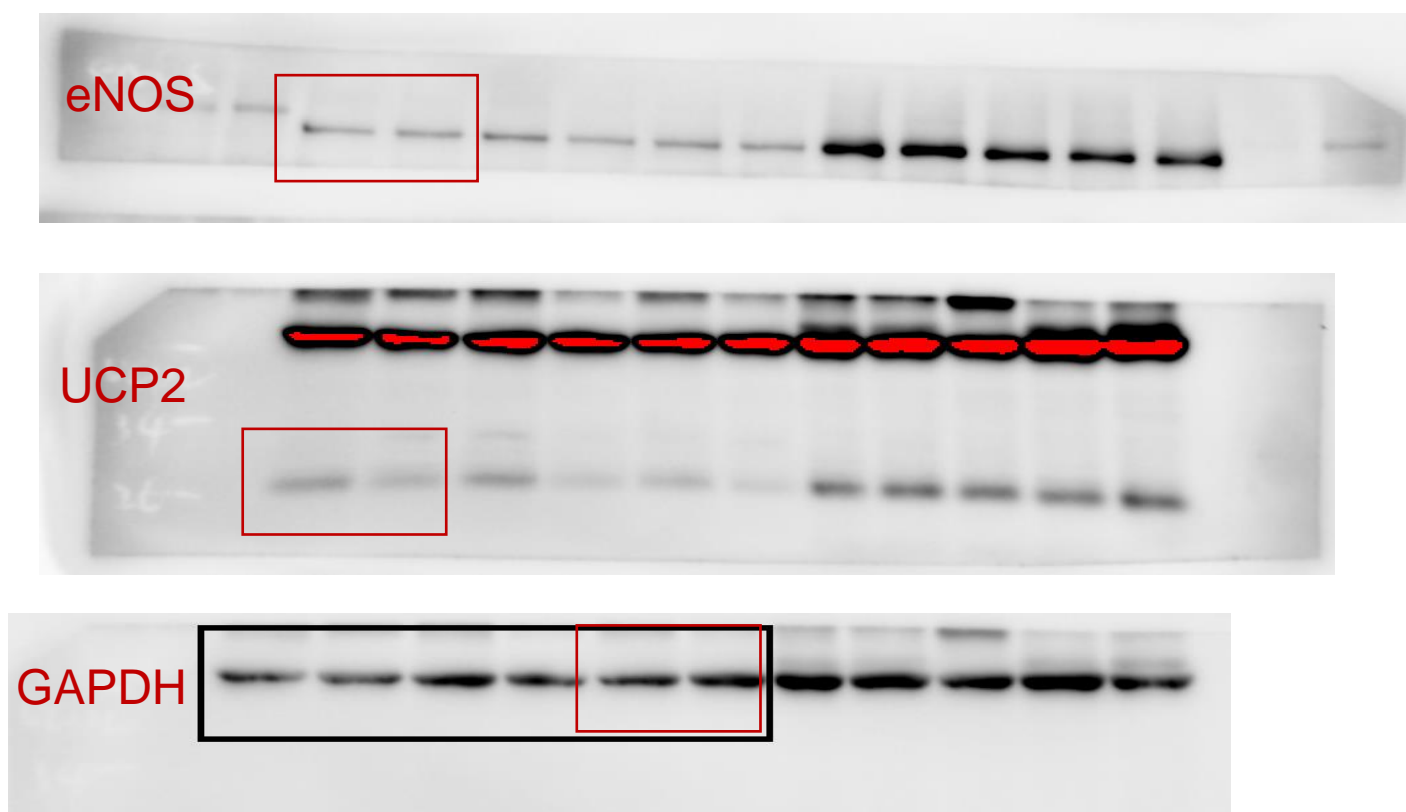

Online Supplemental  
Figure 4F:

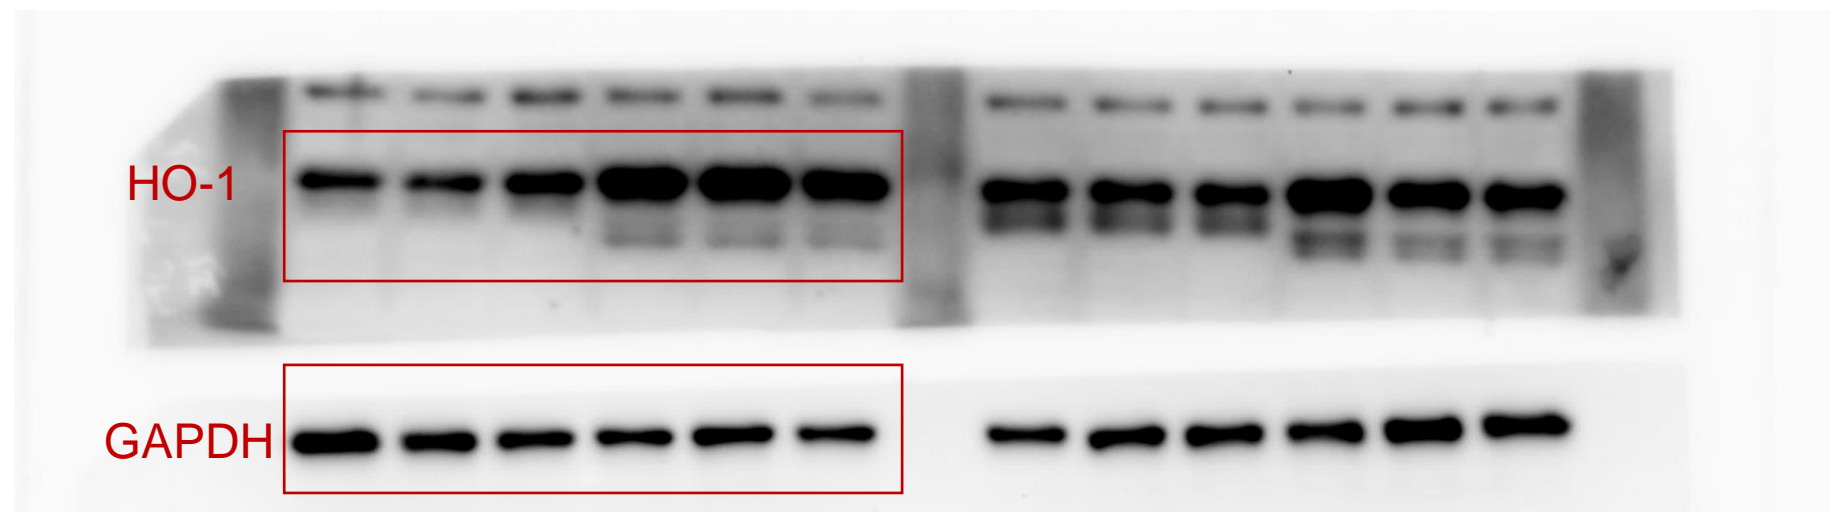

Online Supplemental  
Figure 5B:

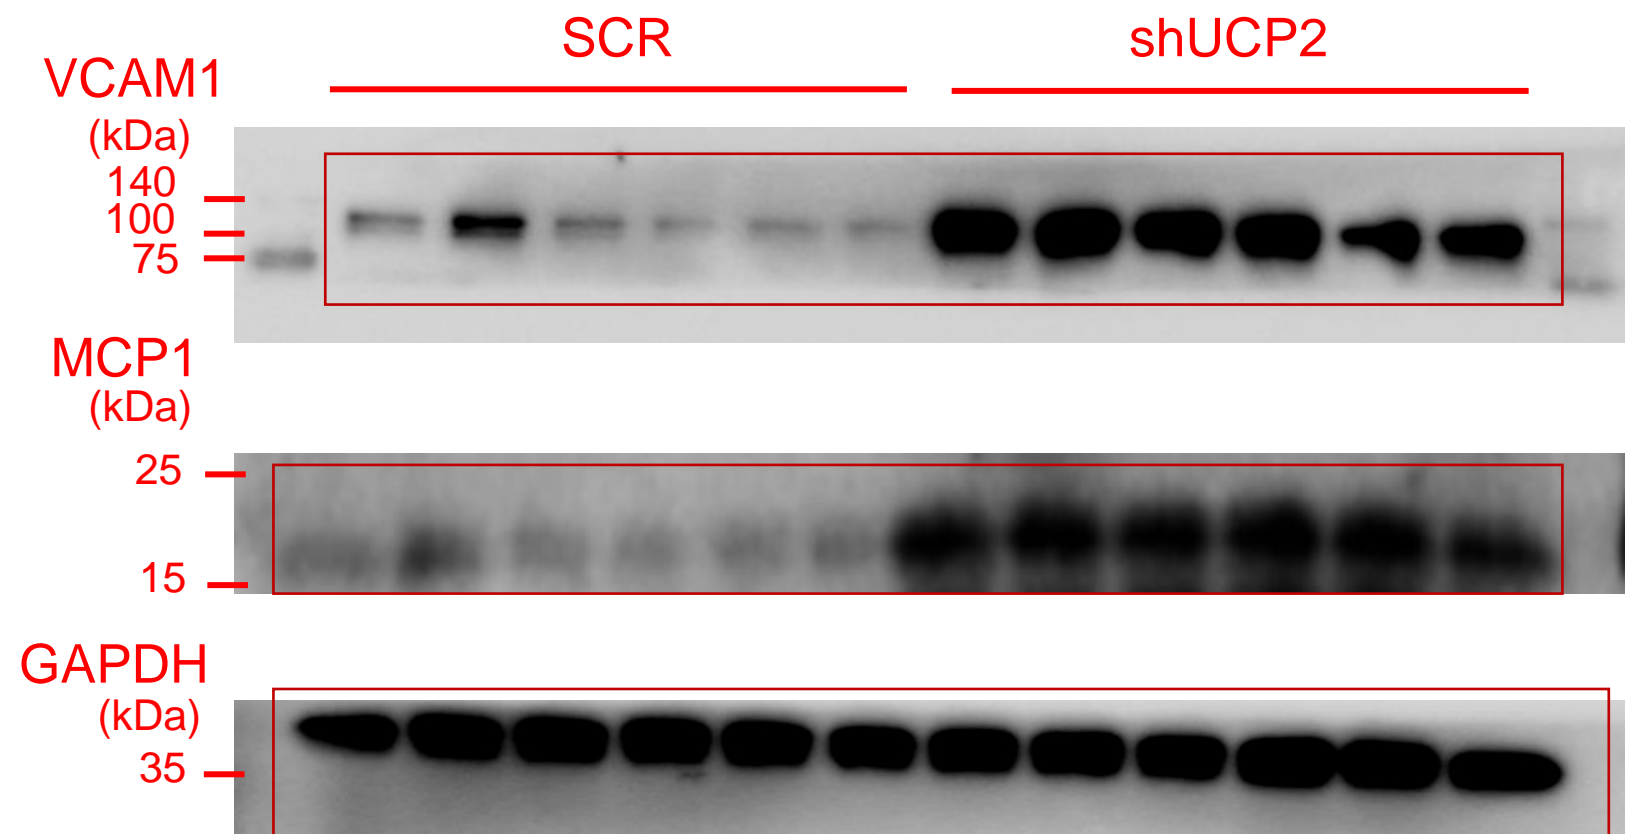

Online Supplemental Figure 6B:

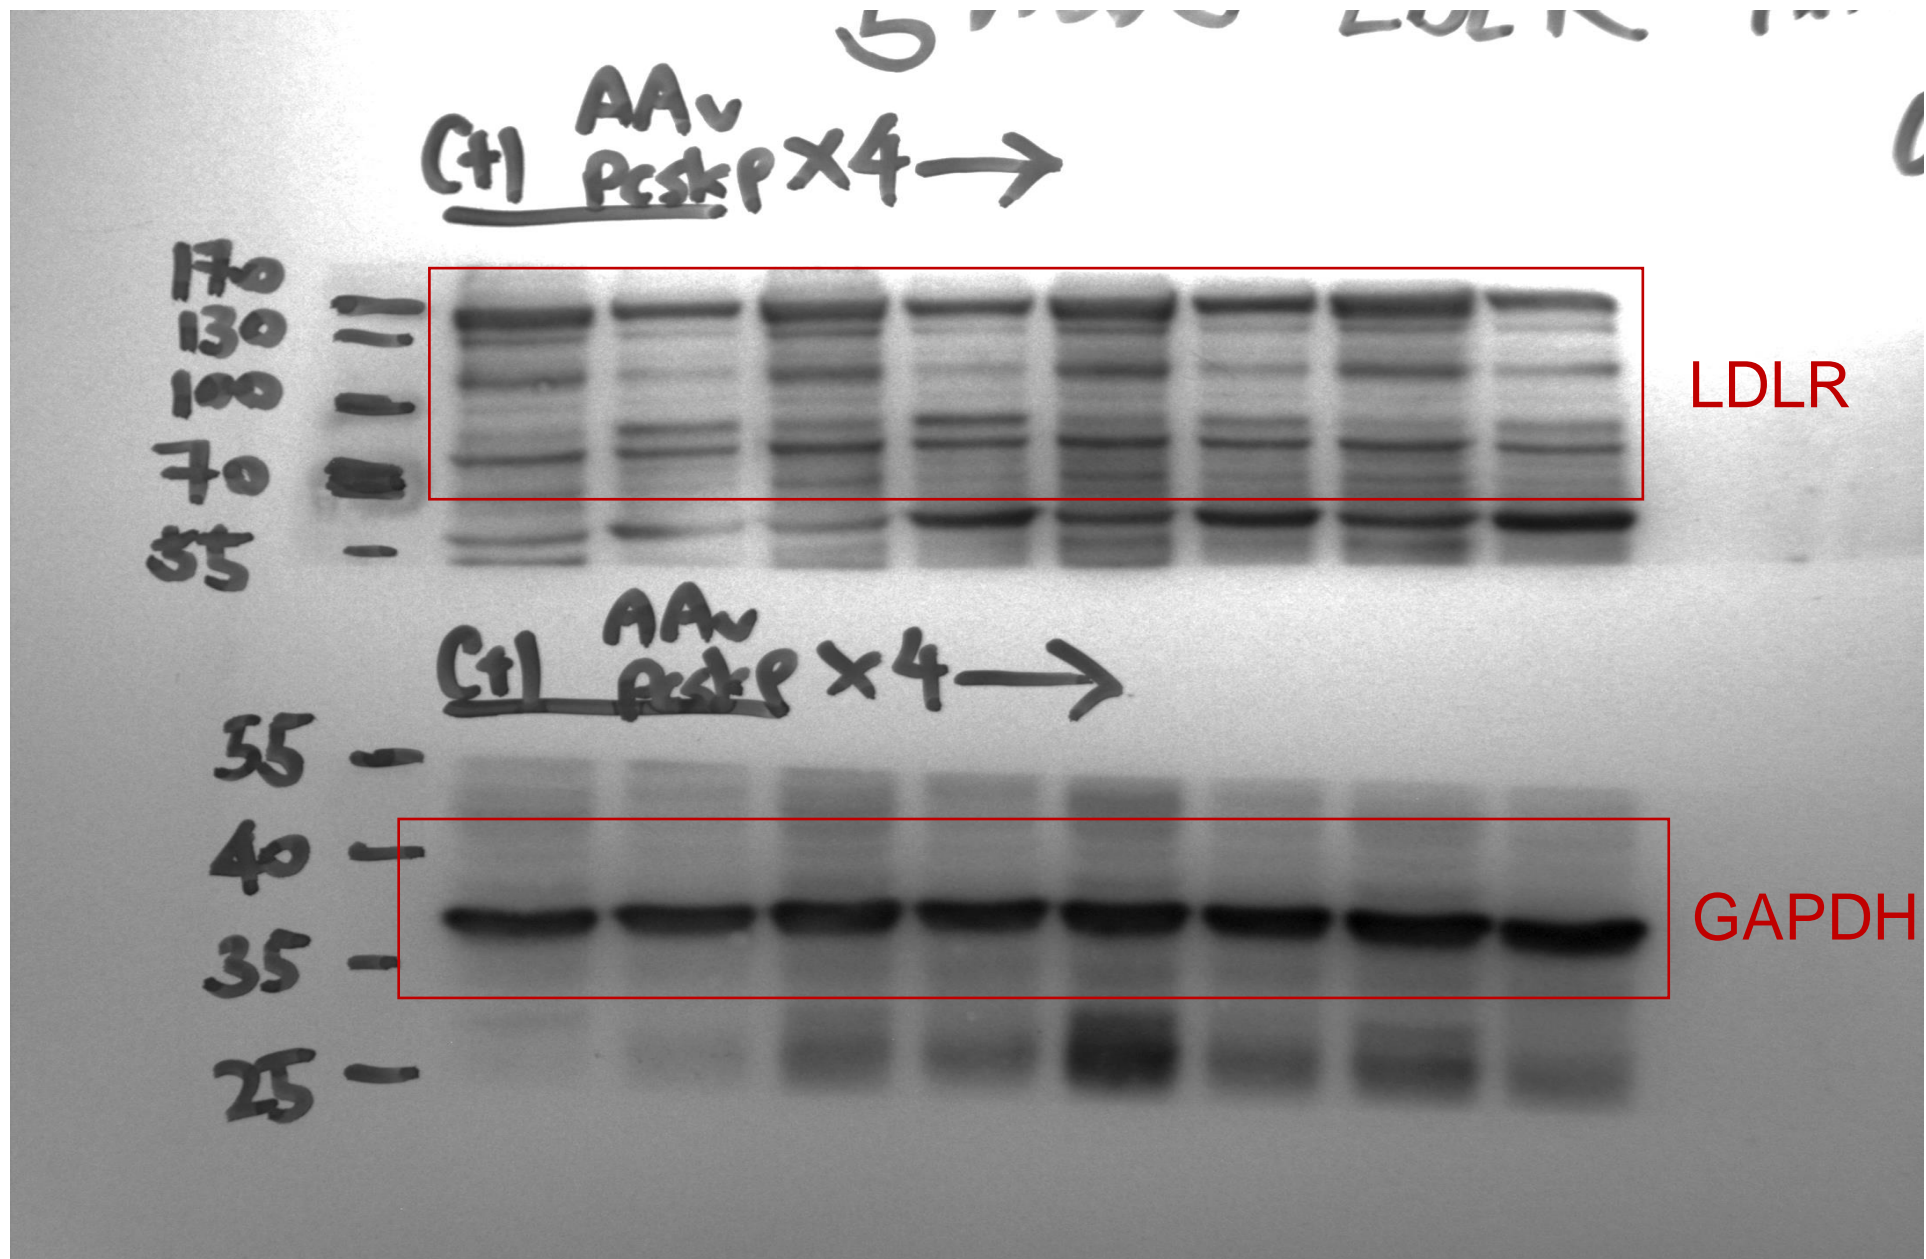

Online Supplemental Figure 7C:

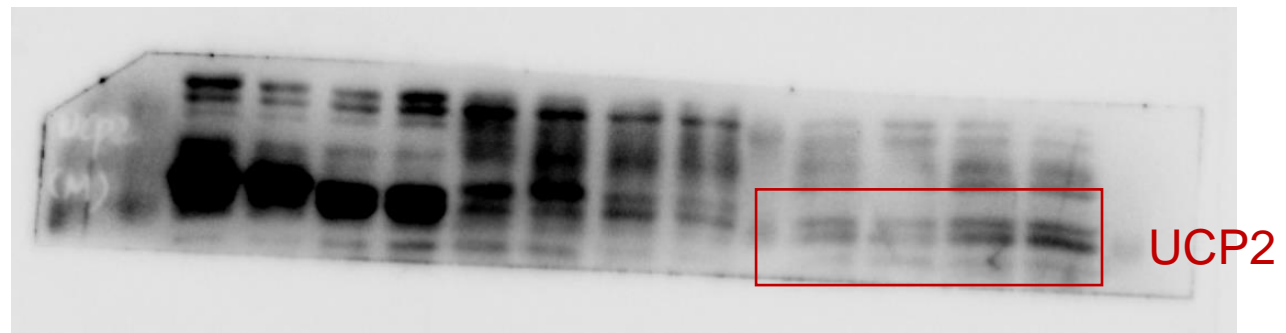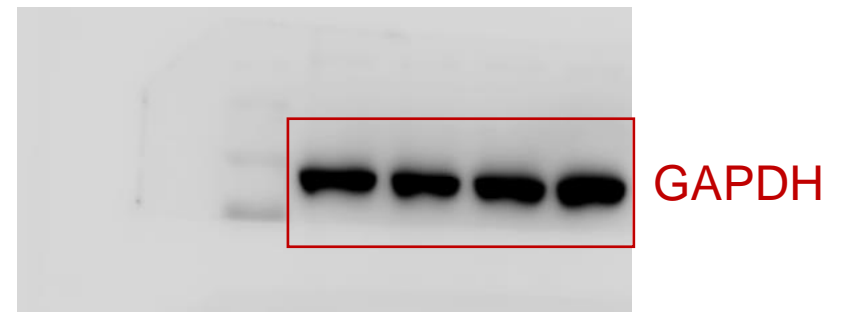

Online Supplemental Figure 8E:

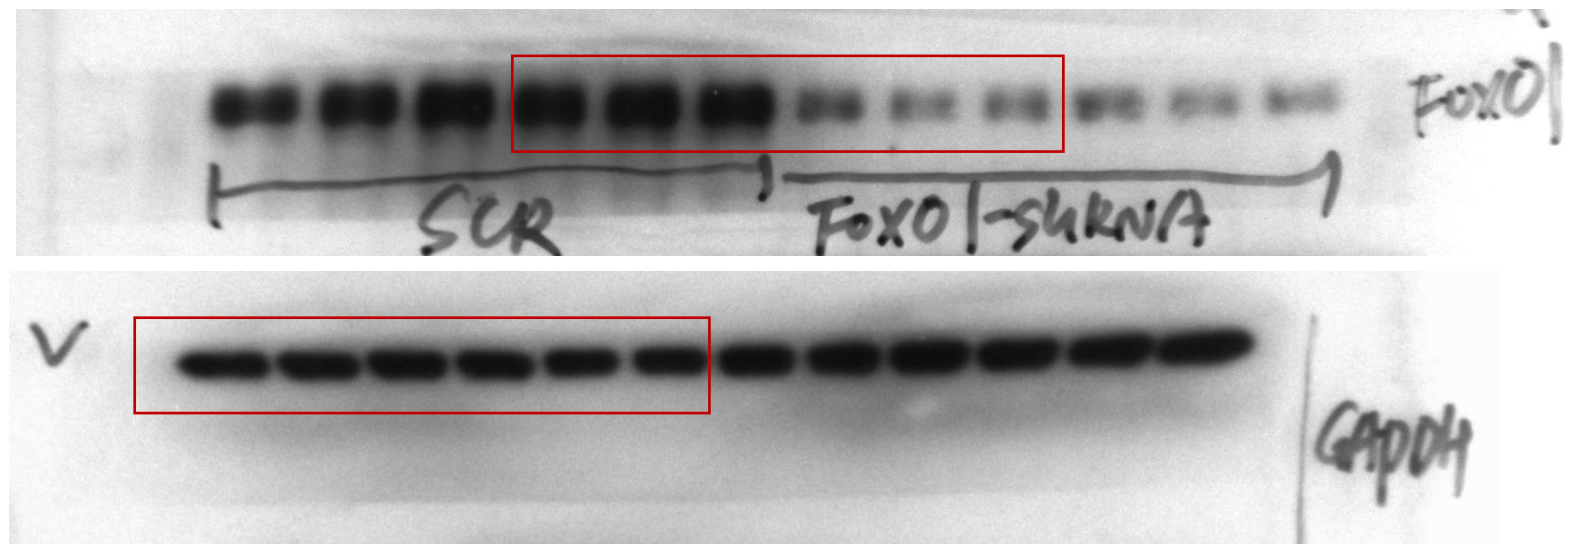

Online Supplemental Figure 8G:

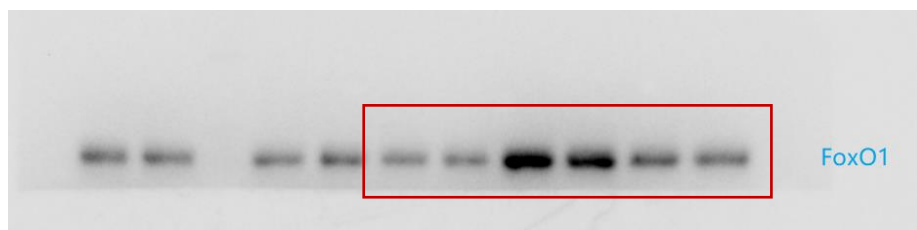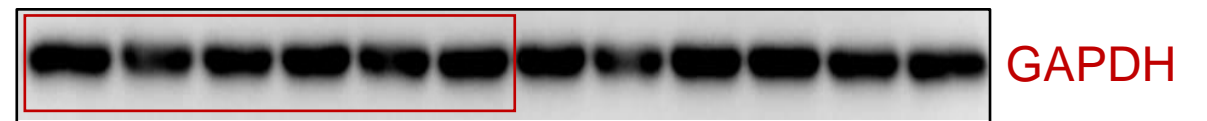

Supplement: res-131-424-s007.pdf [file res-131-424-s007.pdf]
