# Supplementary material for: Endothelial UCP2 Is a Mechanosensitive Suppressor of Atherosclerosis
Source: PubMed Central journal article supplement — Circ Res. 2022 Jul 28;131(5):424–41. doi: 10.1161/CIRCRESAHA.122.321187 (PMC9390236; doi:10.1161/circresaha.122.321187), 2022-07-28
Supplement: res-131-424-s001.pdf [file res-131-424-s001.pdf]

## Major Resources Table

In order to allow validation and replication of experiments, all essential research materials listed in the Methods should be included in the Major Resources Table below. Authors are encouraged to use public repositories for protocols, data, code, and other materials and provide persistent identifiers and/or links to repositories when available. Authors may add or delete rows as needed.

### Animals (*in vivo* studies)

| Species | Vendor or Source | Background Strain | Sex | Persistent ID / URL |
|---------|------------------|-------------------|-----|---------------------|
| Mice    | LASEC/CUHK       | C57BL/6           | M&F | NA                  |
|         |                  |                   |     |                     |

### Genetically Modified Animals

|               | Species | Strains                                                    | Vendor or Source   | Background Strain | Other Information | Persistent ID / URL                                                               |
|---------------|---------|------------------------------------------------------------|--------------------|-------------------|-------------------|-----------------------------------------------------------------------------------|
| Parent-Male   | Mice    | <i>Ucp2</i> floxed mice (B6;129S-Ucp2tm2.1Lowl/J)          | Jackson Laboratory | C57BL/6J          |                   | <a href="https://www.jax.org/strain/022394">https://www.jax.org/strain/022394</a> |
| Parent-Female | Mice    | <i>Cdh5<sup>Cre</sup></i> mice (B6;129-Tg(Cdh5-cre)1Spe/J) | Jackson Laboratory | C57BL/6J          |                   | <a href="https://www.jax.org/strain/017968">https://www.jax.org/strain/017968</a> |
|               | Mice    | <i>ApoE<sup>-/-</sup></i>                                  | LASEC/CUHK         |                   |                   |                                                                                   |
|               |         |                                                            |                    |                   |                   |                                                                                   |
|               |         |                                                            |                    |                   |                   |                                                                                   |

### Antibodies

| Target antigen | Vendor or Source          | Catalog # | Working concentration     | Lot # (preferred but not required) | Persistent ID / URL                                                                                                                                                                                                                                                                                                                                                                   |
|----------------|---------------------------|-----------|---------------------------|------------------------------------|---------------------------------------------------------------------------------------------------------------------------------------------------------------------------------------------------------------------------------------------------------------------------------------------------------------------------------------------------------------------------------------|
| Myc-tag        | Abcam                     | ab9132    | ChIP (1:100)              |                                    | <a href="https://www.abcam.com/myc-tag-antibody-chip-grade-ab9132.html">https://www.abcam.com/myc-tag-antibody-chip-grade-ab9132.html</a>                                                                                                                                                                                                                                             |
| VCAM-1         | Abcam                     | ab134047  | WB (1:1000)<br>IF (1:100) |                                    | <a href="https://www.abcam.com/vcam1-antibody-epr5047-ab134047.html">https://www.abcam.com/vcam1-antibody-epr5047-ab134047.html</a>                                                                                                                                                                                                                                                   |
| MCP-1          | Abcam                     | ab25124   | WB (1:1000)               |                                    | <a href="https://www.abcam.com/mcp1-antibody-ab25124.html">https://www.abcam.com/mcp1-antibody-ab25124.html</a>                                                                                                                                                                                                                                                                       |
| CD68           | Abcam                     | ab237968  | IF (1:100)                |                                    | <a href="https://www.abcam.com/cd68-antibody-fa-11-bsa-and-azide-free-ab237968.html">https://www.abcam.com/cd68-antibody-fa-11-bsa-and-azide-free-ab237968.html</a>                                                                                                                                                                                                                   |
| H3             | Abcam                     | ab1791    | WB (1:5000)               |                                    | <a href="https://www.abcam.com/histone-h3-antibody-nuclear-marker-and-chip-grade-ab1791.html">https://www.abcam.com/histone-h3-antibody-nuclear-marker-and-chip-grade-ab1791.html</a>                                                                                                                                                                                                 |
| eNOS           | BD Bioscience             | 610297    | WB (1:1000)               |                                    | <a href="https://www.bdbiosciences.com/eu/reagents/research/antibodies-buffers/cell-biology-reagents/cell-biology-antibodies/purified-mouse-anti-enosnos-type-iii-3enosnos-type-iii/p/610297">https://www.bdbiosciences.com/eu/reagents/research/antibodies-buffers/cell-biology-reagents/cell-biology-antibodies/purified-mouse-anti-enosnos-type-iii-3enosnos-type-iii/p/610297</a> |
| p-eNOS S1177   | BD Bioscience             | 612392    | WB (1:1000)               |                                    | <a href="https://www.bdbiosciences.com/en-ca/products/reagents/flow-cytometry-reagents/research-reagents/single-color-antibodies-ruo/purified-mouse-anti-enos-ps1177.612392">https://www.bdbiosciences.com/en-ca/products/reagents/flow-cytometry-reagents/research-reagents/single-color-antibodies-ruo/purified-mouse-anti-enos-ps1177.612392</a>                                   |
| FoxO1          | Cell Signaling Technology | 2880      | WB (1:1000)               |                                    | <a href="https://www.cellsignal.com/products/primary-antibodies/foxo1-c29h4-rabbit-mab/2880">https://www.cellsignal.com/products/primary-antibodies/foxo1-c29h4-rabbit-mab/2880</a>                                                                                                                                                                                                   |
| p-FoxO1 S256   | Cell Signaling Technology | 9461      | WB (1:1000)               |                                    | <a href="https://www.cellsignal.com/product/productDetail.jsp?productId=9461">https://www.cellsignal.com/product/productDetail.jsp?productId=9461</a>                                                                                                                                                                                                                                 |

|                                                                                        |                           |           |                             |  |                                                                                                                                                                                                                                                                                       |
|----------------------------------------------------------------------------------------|---------------------------|-----------|-----------------------------|--|---------------------------------------------------------------------------------------------------------------------------------------------------------------------------------------------------------------------------------------------------------------------------------------|
| AMPK $\alpha$                                                                          | Cell Signaling Technology | 2532      | WB (1:1000)                 |  | <a href="https://www.cellsignal.com/product/productDetail.jsp?productId=2532">https://www.cellsignal.com/product/productDetail.jsp?productId=2532</a>                                                                                                                                 |
| p-AMPK T172                                                                            | Cell Signaling Technology | 2535      | WB (1:1000)                 |  | <a href="https://www.cellsignal.com/product/productDetail.jsp?productId=2535">https://www.cellsignal.com/product/productDetail.jsp?productId=2535</a>                                                                                                                                 |
| AKT                                                                                    | Cell Signaling Technology | 9272      | WB (1:1000)                 |  | <a href="https://www.cellsignal.com/product/productDetail.jsp?productId=9272">https://www.cellsignal.com/product/productDetail.jsp?productId=9272</a>                                                                                                                                 |
| p-AKT S473                                                                             | Cell Signaling Technology | 4060      | WB (1:1000)                 |  | <a href="https://www.cellsignal.com/product/productDetail.jsp?productId=4060">https://www.cellsignal.com/product/productDetail.jsp?productId=4060</a>                                                                                                                                 |
| p-AKT T308                                                                             | Cell Signaling Technology | 4056      | WB (1:1000)                 |  | <a href="https://www.cellsignal.com/product/productDetail.jsp?productId=4056">https://www.cellsignal.com/product/productDetail.jsp?productId=4056</a>                                                                                                                                 |
| UCP2                                                                                   | Cell Signaling Technology | 89326     | WB (1:1000)                 |  | <a href="https://www.cellsignal.com/product/productDetail.jsp?productId=89326">https://www.cellsignal.com/product/productDetail.jsp?productId=89326</a>                                                                                                                               |
| I $\kappa$ B $\alpha$                                                                  | Cell Signaling Technology | 4814      | WB (1:1000)                 |  | <a href="https://www.cellsignal.com/product/productDetail.jsp?productId=4814">https://www.cellsignal.com/product/productDetail.jsp?productId=4814</a>                                                                                                                                 |
| GAPDH                                                                                  | Cell Signaling Technology | 2118      | WB (1:1000)                 |  | <a href="https://www.cellsignal.com/products/primary-antibodies/gapdh-14c10-rabbit-mab/2118">https://www.cellsignal.com/products/primary-antibodies/gapdh-14c10-rabbit-mab/2118</a>                                                                                                   |
| LDLR                                                                                   | Invitrogen                | PA5-22976 | WB (1:1000)                 |  | <a href="https://www.thermofisher.com/antibody/product/LDLR-Antibody-Polyclonal/PA5-22976">https://www.thermofisher.com/antibody/product/LDLR-Antibody-Polyclonal/PA5-22976</a>                                                                                                       |
| KLF2                                                                                   | Millipore                 | 09-820    | WB (1:3000)<br>ChIP (1:100) |  | <a href="https://www.emdmillipore.com/US/en/product/Anti-Klf2-Antibody,MM_NF-09-820?ReferrerURL=https%3A%2F%2Fwww.google.com.hk%2F&amp;bd=1">https://www.emdmillipore.com/US/en/product/Anti-Klf2-Antibody,MM_NF-09-820?ReferrerURL=https%3A%2F%2Fwww.google.com.hk%2F&amp;bd=1</a>   |
| UCP2                                                                                   | R&D Systems               | AF4739    | WB (1:500)                  |  | <a href="https://www.rndsystems.com/cn/products/human-mouse-ucp2-antibody_af4739">https://www.rndsystems.com/cn/products/human-mouse-ucp2-antibody_af4739</a>                                                                                                                         |
| UCP2                                                                                   | Santa Cruz Biotechnology  | sc-6526   | IHC (1:100)                 |  | <a href="https://www.scbt.com/p/ucp2-antibody-n-19">https://www.scbt.com/p/ucp2-antibody-n-19</a>                                                                                                                                                                                     |
| IL-6                                                                                   | Santa Cruz Biotechnology  | sc-57315  | WB (1:400)                  |  | <a href="https://www.scbt.com/p/il-6-antibody-10e5">https://www.scbt.com/p/il-6-antibody-10e5</a>                                                                                                                                                                                     |
| Donkey anti-Rabbit IgG (H+L) Highly Cross-Adsorbed Secondary Antibody, Alexa Fluor 546 | Thermo Fisher             | A10040    | IF (1:500)                  |  | <a href="https://www.thermofisher.com/antibody/product/Donkey-anti-Rabbit-IgG-H-L-Highly-Cross-Adsorbed-Secondary-Antibody-Polyclonal/A10040">https://www.thermofisher.com/antibody/product/Donkey-anti-Rabbit-IgG-H-L-Highly-Cross-Adsorbed-Secondary-Antibody-Polyclonal/A10040</a> |
| Rabbit IgG Isotype control                                                             | Invitrogen                | 10500C    | IF (1:100)                  |  | <a href="https://www.thermofisher.com/antibody/product/Rabbit-IgG-Isotype-Control/10500C">https://www.thermofisher.com/antibody/product/Rabbit-IgG-Isotype-Control/10500C</a>                                                                                                         |
| Rat IgG Isotype control                                                                | Invitrogen                | 10700     | IF (1:100)                  |  | <a href="https://www.thermofisher.com/antibody/product/Rat-IgG-Isotype-Control/10700">https://www.thermofisher.com/antibody/product/Rat-IgG-Isotype-Control/10700</a>                                                                                                                 |

## DNA/cDNA Clones

DOI [to be added]

| Clone Name                | Sequence                                                                                                          | Source / Repository                                   | Persistent ID / URL                                                                                                                                                                                                                                                                                           |
|---------------------------|-------------------------------------------------------------------------------------------------------------------|-------------------------------------------------------|---------------------------------------------------------------------------------------------------------------------------------------------------------------------------------------------------------------------------------------------------------------------------------------------------------------|
| Human KLF2                |                                                                                                                   | NM_016270.4                                           |                                                                                                                                                                                                                                                                                                               |
| Mouse Klf2                |                                                                                                                   | NM_008452.2                                           |                                                                                                                                                                                                                                                                                                               |
| pAdtrack-CMV              | <a href="https://www.addgene.org/16405/sequences/">https://www.addgene.org/16405/sequences/</a>                   | Addgene/ Bert Vogelstein                              | <a href="https://www.addgene.org/16405/">https://www.addgene.org/16405/</a>                                                                                                                                                                                                                                   |
| pAdEasy-1                 | <a href="https://www.addgene.org/16400/sequences/">https://www.addgene.org/16400/sequences/</a>                   | Addgene/ Bert Vogelstein                              | <a href="https://www.addgene.org/16400/">https://www.addgene.org/16400/</a>                                                                                                                                                                                                                                   |
| Ad-KLF2                   |                                                                                                                   | Generated in Yu Huang lab/CUHK                        |                                                                                                                                                                                                                                                                                                               |
| Ad-shKLF2                 |                                                                                                                   | Vector Biolabs; Cat. No: shADV-213187                 | <a href="https://www.vectorbiolabs.com/product/shadv-213187-human-klf2-shrna-silencing-adenovirus/">https://www.vectorbiolabs.com/product/shadv-213187-human-klf2-shrna-silencing-adenovirus/</a>                                                                                                             |
| Ad-GFP                    |                                                                                                                   | Generated in Yu Huang lab                             |                                                                                                                                                                                                                                                                                                               |
| Ad-SCR                    |                                                                                                                   | Generated in Yu Huang lab                             |                                                                                                                                                                                                                                                                                                               |
| psPAX2                    | <a href="https://www.addgene.org/12260/sequences/">https://www.addgene.org/12260/sequences/</a>                   | Addgene/ Didier Trono                                 | <a href="https://www.addgene.org/12260/">https://www.addgene.org/12260/</a>                                                                                                                                                                                                                                   |
| pMD2.G                    | <a href="https://www.addgene.org/12259/sequences/">https://www.addgene.org/12259/sequences/</a>                   | Addgene/ Didier Trono                                 | <a href="https://www.addgene.org/12259/">https://www.addgene.org/12259/</a>                                                                                                                                                                                                                                   |
| LV-SCR                    |                                                                                                                   | Genechem                                              | CON077                                                                                                                                                                                                                                                                                                        |
| LV-shFOXO1                |                                                                                                                   | Genechem                                              | <a href="http://www.taogene.com/emkt.htm#/PcMerchandises?id=367f4d07-e482-408a-8ac1-0582436bf35e&amp;categoryId=12">http://www.taogene.com/emkt.htm#/PcMerchandises?id=367f4d07-e482-408a-8ac1-0582436bf35e&amp;categoryId=12</a>                                                                             |
| LV-shSMAD4                |                                                                                                                   | Genechem                                              | <a href="http://www.taogene.com/emkt.htm#/PcMerchandises?id=6f567ccf-4e7f-4e23-906d-c0c817c36fc0&amp;categoryId=12">http://www.taogene.com/emkt.htm#/PcMerchandises?id=6f567ccf-4e7f-4e23-906d-c0c817c36fc0&amp;categoryId=12</a>                                                                             |
| LV-shPPARGC1A             |                                                                                                                   | Genechem                                              | <a href="http://www.taogene.com/emkt.htm#/PcMerchandises?id=b30c0b84-69ac-4b13-89c9-97d3e1e191c7&amp;categoryId=12">http://www.taogene.com/emkt.htm#/PcMerchandises?id=b30c0b84-69ac-4b13-89c9-97d3e1e191c7&amp;categoryId=12</a>                                                                             |
| <i>Cdh5</i> promoter      |                                                                                                                   | PCR cloned from genomic DNA isolated from mouse liver | <a href="https://pubmed.ncbi.nlm.nih.gov/9864160/">https://pubmed.ncbi.nlm.nih.gov/9864160/</a>                                                                                                                                                                                                               |
| pAAV-MCS                  | <a href="https://www.addgene.org/browse/sequence_vdb/1642/">https://www.addgene.org/browse/sequence_vdb/1642/</a> | Stratagene                                            | <a href="https://www.addgene.org/vector-database/1642/">https://www.addgene.org/vector-database/1642/</a>                                                                                                                                                                                                     |
| pAAV-DJ                   | VPK-420-DJ                                                                                                        | Cell Biolabs                                          | <a href="https://www.cellbiolabs.com/sites/default/files/VPK-420-DJ-aav-dj-vector.pdf">https://www.cellbiolabs.com/sites/default/files/VPK-420-DJ-aav-dj-vector.pdf</a>                                                                                                                                       |
| RGDLRVS-AAV9-cap          |                                                                                                                   | Dr. O.J. Müller                                       | <a href="https://pubmed.ncbi.nlm.nih.gov/21956692/">https://pubmed.ncbi.nlm.nih.gov/21956692/</a>                                                                                                                                                                                                             |
| pAAV/D377Y-mPCSK9         | 58376                                                                                                             | Addgene/Jacob Bentzon                                 | <a href="https://www.addgene.org/58376/">https://www.addgene.org/58376/</a>                                                                                                                                                                                                                                   |
| AAV- <i>Cdh5</i> -Vector  | CMV promoter in pAAV-MCS was replaced by <i>Cdh5</i> promoter                                                     | Generated in Yu Huang lab                             |                                                                                                                                                                                                                                                                                                               |
| AAV- <i>Cdh5</i> -Ucp2    | CMV promoter in pAAV-MCS was replaced by <i>Cdh5</i> promoter                                                     | Generated in Yu Huang lab                             |                                                                                                                                                                                                                                                                                                               |
| Ad- <i>Cdh5</i> -Klf2     | Mouse Klf2 cDNA was inserted into pAd- <i>Cdh5</i> vector                                                         | Generated in Yu Huang lab                             |                                                                                                                                                                                                                                                                                                               |
| pGL3-Basic Luciferase     | E1751                                                                                                             | Promega                                               | <a href="https://worldwide.promega.com/products/luciferase-assays/genetic-reporter-vectors-and-cell-lines/pgl3-luciferase-reporter-vectors/?catNum=E1751">https://worldwide.promega.com/products/luciferase-assays/genetic-reporter-vectors-and-cell-lines/pgl3-luciferase-reporter-vectors/?catNum=E1751</a> |
| pLX313-Renilla luciferase | <a href="https://www.addgene.org/118016/sequences/">https://www.addgene.org/118016/sequences/</a>                 | Addgene/ William Hahn, David Root                     | <a href="https://www.addgene.org/118016/">https://www.addgene.org/118016/</a>                                                                                                                                                                                                                                 |

## Cultured Cells

| Name    | Vendor or Source | Sex (F, M, or unknown) | Persistent ID / URL |
|---------|------------------|------------------------|---------------------|
| HUVECs  | Lonza            | Unknown                | CC-2519             |
| HAEC    | Invitrogen       | Unknown                | C0065C              |
| HEK239  | ATCC             | Unknown                | CRL-1573            |
| HEK293T | ATCC             | Unknown                | CRL-3216            |

## ARRIVE GUIDELINES

The ARRIVE guidelines (<https://arriveguidelines.org/>) are a checklist of recommendations to improve the reporting of research involving animals. Key elements of the study design should be included below to better enable readers to scrutinize the research adequately, evaluate its methodological rigor, and reproduce the methods or findings.

### Study Design

| Groups            | Sex | Age       | Number (prior to experiment) | Number (after termination) | Littermates (Yes/No) | Other description                                                                                       |
|-------------------|-----|-----------|------------------------------|----------------------------|----------------------|---------------------------------------------------------------------------------------------------------|
| Group 1 (Control) | M/F | 8-10 wks  | 7                            | 7                          | NA                   | <i>Ucp2<sup>ff</sup></i> mice fed on western diet                                                       |
| Group 2           | M/F | 8-10 wks  | 9                            | 9                          | NA                   | <i>Ucp2<sup>AEC</sup></i> mice fed on western diet                                                      |
| Group 3 (Control) | M/F | 8-10 wks  | 7                            | 6                          | NA                   | <i>Ucp2<sup>ff</sup></i> mice fed on western diet and subjected to partial ligation of carotid artery   |
| Group 4           | M/F | 8-10 wks  | 7                            | 7                          | NA                   | <i>Ucp2<sup>AEC</sup></i> mice fed on western diet and subjected to partial ligation of carotid artery  |
| Group 5 (Control) | M   | 10-12 wks | 8                            | 8                          | NA                   | <i>ApoE<sup>-/-</sup></i> mice receiving AAV-vector, subjected to partial ligation of carotid artery    |
| Group 6           | M   | 10-12 wks | 8                            | 8                          | NA                   | <i>ApoE<sup>-/-</sup></i> mice receiving AAV-Cdh5-Ucp2, subjected to partial ligation of carotid artery |
| Group 7 (Control) | M/F | 8-10 wks  | 7                            | 7                          | NA                   | <i>Ucp2<sup>ff</sup></i> mice subjected to partial ligation of carotid artery, and treated with vehicle |
| Group 8           | M/F | 8-10 wks  | 7                            | 7                          | NA                   | <i>Ucp2<sup>AEC</sup></i> mice subjected to partial ligation of                                         |

DOI [to be added]

|          |     |          |   |   |    |                                                                                                              |
|----------|-----|----------|---|---|----|--------------------------------------------------------------------------------------------------------------|
|          |     |          |   |   |    | carotid artery, and treated with vehicle                                                                     |
| Group 9  | M/F | 8-10 wks | 7 | 7 | NA | <i>Ucp2<sup>fl/fl</sup></i> mice subjected to partial ligation of carotid artery, and treated with AS1842856 |
| Group 10 | M/F | 8-10 wks | 7 | 7 | NA | <i>Ucp2<sup>ΔEC</sup></i> mice subjected to partial ligation of carotid artery, and treated with AS1842856   |

**Sample Size:** Please explain how the sample size was decided Please provide details of any a *prior* sample size calculation, if done.

We did not use G\*power software to determine the animal group sizes. Sample size were determined according to our previous experience with mouse model of atherosclerosis. To account for potential loss of mice due to illness or sudden death, group size of 7-10 mice were chosen.

#### **Inclusion Criteria**

All the mice and samples were included for analysis unless unsuccessful surgical operation or sample processing happens.

#### **Exclusion Criteria**

Partial ligation of carotid artery was not successful in one mouse of the *Ucp2<sup>fl/fl</sup>* group and the data from this mouse was excluded. In all other cases, no animals were excluded from analysis.

#### **Randomization**

Animals with same date of birth were randomly assigned to each experimental group.

#### **Blinding**

Analyses of animal experiments were blinded whenever possible by numerical coding of samples.
